# Supplementary material
Source: MDPI journal article supplement (https://www.mdpi.com/2075-163X/10/3/272)
Supplement: s1 [file s1]

# The Colour Palette of the Mosaics in the Roman Villa of Noheda (Spain)

Nadine Schibille <sup>1,\*</sup>, Cristina Boschetti <sup>1</sup>, Miguel Ángel Valero Tévar <sup>2</sup>, Emmanuel Veron <sup>3</sup>  
and Jorge de Juan Ares <sup>1</sup>

<sup>1</sup> IRAMAT-CEB, UMR5060, CNRS/Université d'Orléans, 3D rue de la Férollerie, CS 60061, 45071 Orléans cedex 2, France; cristina.boschetti@cnrs-orleans.fr (C.B.); Jorge.de-juan@cnrs-orleans.fr (J.d.J.A.)

<sup>2</sup> Departamento de Historia Antigua, Facultad de Humanidades y Ciencias de la Educación, Universidad de Castilla-La Mancha, Av. de los Altares s/n, 16071 Cuenca, Spain; MiguelAngel.Valero@uclm.es

<sup>3</sup> CEMHTI-CNRS UPR3079, Site Haute Température, CS 90055, 1D avenue de la Recherche Scientifique, 45071 Orléans cedex 2, France; emmanuel.veron@cnrs-orleans.fr

\* Correspondence: nadine.schibille@cnrs-orleans.fr

## The PDF file includes:

### Supplementary Materials

Figure S1.  $\text{TiO}_2/\text{Al}_2\text{O}_3$  and  $\text{Na}_2\text{O}/\text{CaO}$  ratios of the different glass groups separated by colour and base glass type (natron and plant ash)

Table S2. Average LA-ICP-MS data of glass standards in comparison with published values for Corning glass standards A, B, and NIST 612.

Table S3. Kruskal-Wallis and Welch's ANOVA test of  $\text{TiO}_2/\text{Al}_2\text{O}_3$  and  $\text{Na}_2\text{O}/\text{CaO}$  ratios of different glass groups separated by colour and base glass type.

## Other Supplementary Material for this manuscript:

Table S1 (Microsoft Excel format). Complete LA-ICP-MS data of 421 mosaic tesserae from Noheda (Cuenca, Spain).

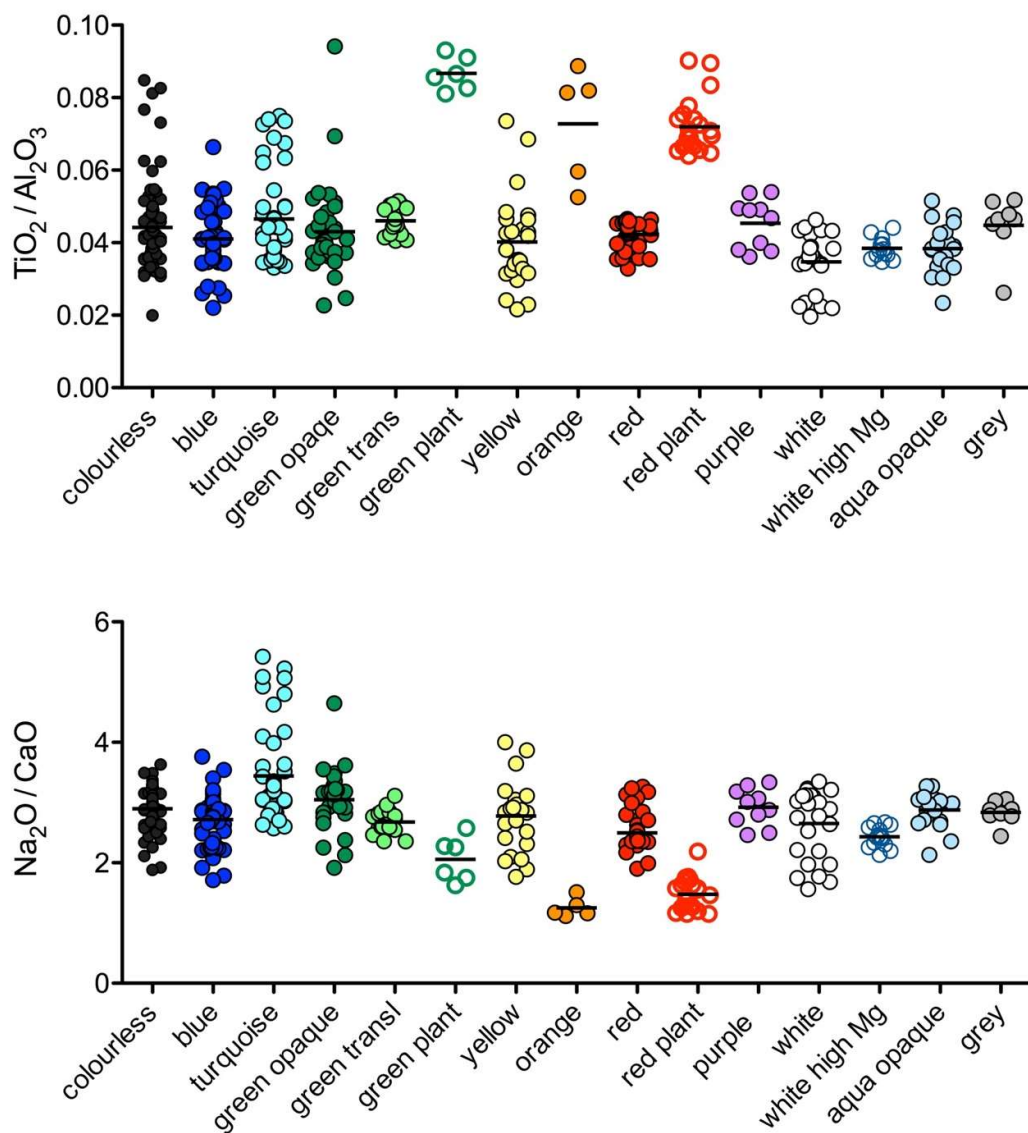

**Figure 1.**  $\text{TiO}_2/\text{Al}_2\text{O}_3$  and  $\text{Na}_2\text{O}/\text{CaO}$  ratios of the different glass groups separated by colour and base glass type (natron and plant ash), showing the group means (indicated by a line) and individual data points. Note that the vast majority of the glasses are of the natron type (colourless, blue, turquoise, green opaque and green translucent, yellow, red, purple, white and white with high magnesia, aqua opaque, and grey); the plant ash glasses comprise the green (plant), orange, and red (plant) groups.

**Table S2. Average LA-ICP-MS data of glass standards in comparison with published values for Corning glass standards A, B, and NIST 612.**

|                      | Major and minor elements [wt %] |      |       |      |       |        |       |        |        |       |       |       |      |        |       |       |       |       |      |       |       |      |      |
|----------------------|---------------------------------|------|-------|------|-------|--------|-------|--------|--------|-------|-------|-------|------|--------|-------|-------|-------|-------|------|-------|-------|------|------|
|                      | Na2O                            | MgO  | Al2O3 | SiO2 | P2O5  | Cl     | K2O   | CaO    | TiO2   | MnO   | Fe2O3 | CoO   | CuO  | Rb2O   | SrO   | ZrO2  | SnO2  | Sb2O3 | BaO  | PbO   | Bi    |      |      |
| Corning A (n = 44)   | 13.9                            | 2.53 | 0.92  | 66.9 | 0.11  | 0.13   | 2.85  | 5.77   | 0.78   | 1.02  | 1.11  | 0.17  | 1.16 | 0.01   | 0.10  | 0.01  | 0.17  | 1.62  | 0.46 | 0.06  | 0.00  |      |      |
| SD                   | 0.2                             | 0.06 | 0.04  | 0.4  | 0.01  | 0.01   | 0.04  | 0.15   | 0.03   | 0.02  | 0.02  | 0.00  | 0.02 | 0.00   | 0.00  | 0.00  | 0.00  | 0.05  | 0.01 | 0.00  | 0.00  |      |      |
| Vicenzi et al. 2002  | 14.3                            | 2.66 | 1.00  | 66.6 | 0.13  | 0.10   | 2.87  | 5.03   | 0.79   | 1.00  | 1.09  | 0.17  | 1.17 | 0.01   | 0.10  | 0.01  | 0.19  | 1.58  | 0.46 | 0.073 | 0.00  |      |      |
| Wagner et al. 2012   | 0.4                             | 0.13 | 0.08  | -0.3 | 0.02  | -0.03  | 0.02  | -0.74  | 0.01   | -0.02 | -0.02 | 0.00  | 0.01 | 0.00   | 0.00  | 0.00  | 0.02  | -0.05 | 0.00 | 0.01  | 0.00  |      |      |
| accuracy             | 3.1                             | 5.04 | 7.56  | -0.5 | 12.95 | -29.78 | 0.80  | -14.68 | 1.88   | -1.62 | -1.98 | -0.19 | 1.15 | 4.48   | -4.18 | -9.03 | 12.76 | -2.91 | 0.64 | 14.47 | 13.60 |      |      |
| Corning B (n = 19)   | 16.7                            | 1.01 | 4.46  | 62.4 | 0.81  | 0.21   | 1.01  | 8.61   | 0.10   | 0.24  | 0.34  | 0.04  | 2.65 | 0.00   | 0.02  | 0.02  | 0.02  | 0.43  | 0.08 | 0.42  | 0.00  |      |      |
| SD                   | 0.2                             | 0.02 | 0.10  | 0.3  | 0.03  | 0.01   | 0.01  | 0.13   | 0.00   | 0.00  | 0.01  | 0.00  | 0.03 | 0.00   | 0.00  | 0.00  | 0.00  | 0.01  | 0.00 | 0.01  | 0.00  |      |      |
| Vicenzi et al. 2002  | 17.0                            | 1.03 | 4.36  | 61.6 | 0.82  | 0.20   | 1.00  | 8.56   | 0.09   | 0.25  | 0.34  | 0.05  | 2.66 | 0.00   | 0.02  | 0.03  | 0.04  | 0.41  | 0.08 | 0.61  | 0.01  |      |      |
| Wagner et al. 2012   | 0.3                             | 0.02 | -0.10 | -0.9 | 0.01  | -0.01  | -0.01 | -0.05  | -0.01  | 0.01  | 0.00  | 0.00  | 0.01 | 0.00   | 0.00  | 0.00  | 0.02  | -0.01 | 0.00 | 0.19  | 0.00  |      |      |
| accuracy             | 1.9                             | 2.09 | -2.28 | -1.4 | 1.47  | -3.31  | -0.80 | -0.56  | -13.30 | 2.08  | -1.16 | 4.18  | 0.24 | -24.79 | 5.87  | 5.80  | 40.89 | -3.55 | 1.36 | 31.49 | 20.24 |      |      |
| NIST 612 (n = 41)    | 13.5                            | 0.01 | 2.02  | 72.8 | 0.02  | 0.05   | 0.01  | 11.4   | 0.01   | 0.01  | 0.01  | 0.00  | 0.00 | 0.00   | 0.01  | 0.00  | 0.00  | 0.00  | 0.00 | 0.00  | 0.00  |      |      |
| SD                   | 0.2                             | 0.00 | 0.12  | 0.4  | 0.01  | 0.05   | 0.01  | 0.3    | 0.00   | 0.00  | 0.00  | 0.00  | 0.00 | 0.00   | 0.00  | 0.00  | 0.00  | 0.00  | 0.00 | 0.00  | 0.00  |      |      |
| Jochum et al. 2011   | 13.7                            |      | 2.03  | 72.1 |       |        |       | 11.9   |        |       |       |       |      |        |       |       |       |       |      |       |       |      |      |
|                      | 0.2                             |      | 0.01  | -0.7 |       |        |       | 0.5    |        |       |       |       |      |        |       |       |       |       |      |       |       |      |      |
| accuracy             | 1.7                             |      | 0.27  | -1.0 |       |        |       | 4.3    |        |       |       |       |      |        |       |       |       |       |      |       |       |      |      |
| Trace elements [ppm] |                                 |      |       |      |       |        |       |        |        |       |       |       |      |        |       |       |       |       |      |       |       |      |      |
|                      | Li                              | B    | V     | Cr   | Co    | Ni     | Cu    | Zn     | Ga     | As    | Rb    | Sr    | Y    | Zr     | Nb    | Mo    | Ag    | Cd    | In   | Sn    | Sb    | Cs   | Ba   |
| NIST612 (n = 42)     | 41.7                            | 34.9 | 37.7  | 38.1 | 35.0  | 37.7   | 36.1  | 38.0   | 36.1   | 33.7  | 32.2  | 75.4  | 36.9 | 36.7   | 34.6  | 32.8  | 20.7  | 42.7  | 37.3 | 34.1  | 37.1  | 41.1 | 36.1 |
| SD                   | 1.9                             | 2.6  | 1.1   | 6.7  | 0.9   | 1.8    | 1.0   | 3.8    | 0.7    | 2.7   | 0.5   | 2.9   | 1.6  | 1.7    | 1.2   | 1.3   | 1.5   | 2.3   | 0.6  | 0.8   | 7.2   | 1.0  | 1.0  |
| Jochum et al. 2011   | 40.2                            | 34.3 | 38.8  | 36.4 | 35.5  | 38.8   | 37.8  | 39.1   | 36.9   | 35.7  | 31.4  | 78.4  | 38.3 | 37.9   | 38.9  | 35.8  | 22.0  | 28.1  | 38.9 | 38.6  | 34.7  | 42.7 | 39.3 |
| Table 7              | -1.5                            | -0.6 | 1.1   | -1.7 | 0.5   | 1.1    | 1.7   | 1.1    | 0.8    | 2.0   | -0.8  | 3.0   | 1.4  | 1.2    | 4.3   | 3.0   | 1.3   | -14.6 | 1.6  | 4.5   | -2.4  | 1.6  | 3.2  |
| accuracy             | -3.7                            | -1.7 | 2.9   | -4.7 | 1.4   | 2.8    | 4.5   | 2.9    | 2.1    | 5.6   | -2.5  | 3.8   | 3.7  | 3.2    | 10.9  | 8.5   | 6.1   | -52.1 | 4.1  | 11.7  | -6.8  | 3.7  | 8.2  |
|                      | La                              | Ce   | Pr    | Nd   | Sm    | Eu     | Gd    | Tb     | Dy     | Ho    | Er    | Tm    | Yb   | Lu     | Hf    | Ta    | W     | Pt    | Au   | Pb    | Bi    | Th   | U    |
| NIST612 (n = 42)     | 38.0                            | 38.7 | 36.8  | 34.9 | 36.7  | 36.0   | 33.7  | 36.8   | 33.6   | 37.6  | 34.5  | 35.2  | 37.6 | 36.3   | 34.6  | 30.9  | 30.3  | 2.39  | 4.40 | 33.1  | 30.8  | 37.2 | 38.3 |
| SD                   | 2.3                             | 2.2  | 1.5   | 1.2  | 1.3   | 1.1    | 2.1   | 1.3    | 1.2    | 1.3   | 1.4   | 1.1   | 1.5  | 1.3    | 1.4   | 0.9   | 2.2   | 0.13  | 0.45 | 2.4   | 0.6   | 2.2  | 1.8  |
| Jochum et al. 2011   | 36.0                            | 38.4 | 37.9  | 35.5 | 37.7  | 35.6   | 37.3  | 37.6   | 35.5   | 38.3  | 38.0  | 36.8  | 39.2 | 37.0   | 36.7  | 37.6  | 38.0  | 2.51  | 4.77 | 38.6  | 30.2  | 37.8 | 37.4 |
|                      | -2.0                            | -0.3 | 1.1   | 0.6  | 1.0   | -0.4   | 3.6   | 0.8    | 1.9    | 0.7   | 3.5   | 1.6   | 1.6  | 0.7    | 2.1   | 6.7   | 7.7   | 0.12  | 0.37 | 5.5   | -0.6  | 0.6  | -0.9 |
| accuracy             | -5.7                            | -0.7 | 2.8   | 1.6  | 2.6   | -1.3   | 9.6   | 2.0    | 5.5    | 1.9   | 9.1   | 4.2   | 4.0  | 2.0    | 5.7   | 17.7  | 20.4  | 4.69  | 7.67 | 14.3  | -1.9  | 1.6  | -2.4 |

Jochum et al. Determination of reference values for NIST SRM 610–617 glasses following ISO guidelines. *Geostandards and Geoanalytical Research* 35397-429 (2011).

Vicenzi et al. Microbeam characterization of Corning archeological reference glasses: new additions to the Smithsonian microbeam standard collection. *Journal of Research of the National Institute of Standards and technology*, 107, 719 (2002).

Wagner et al. Critical assessment of the elemental composition of Corning archeological reference glasses by LA-ICP-MS. *Analytical and bioanalytical chemistry*, 402, 1667-1677 (2012).

**Table S3. Statistical comparison of group data.** Kruskal-Wallis with post-hoc Dunn's test was carried out on the  $\text{TiO}_2/\text{Al}_2\text{O}_3$  and  $\text{Na}_2\text{O}/\text{CaO}$  ratios (in black). However, since the data show some heteroscedasticity, we also performed **Welch's ANOVA with post-hoc Games-Howell test (in red)**. The majority of the natron-type glass groups separated by colour do not show statistically significant differences (ns), with the exception of the turquoise, red and white tesserae. The tests systematically identified significant differences between the natron-type glass groups and the red and green samples with a plant ash component (highlighted in grey) (\*  $P < 0.05$ , \*\*  $P < 0.01$ , \*\*\*  $P < 0.001$ ).

| $\text{TiO}_2/\text{Al}_2\text{O}_3$               | Colorless<br>(n=70) | Blue<br>(n=61) | Turquoise<br>(n=49) | Green opaque<br>(n=33) | Green transl.<br>(n=18) | Green ash<br>(n=6) | Yellow<br>(n=25) | Orange<br>(n=5) | Red<br>(n=48) | Red ash<br>(n=22) | Purple<br>(n=10) | White<br>(n=25) | White high Mg<br>(n=14) | Aqua opaque<br>(n=20) |
|----------------------------------------------------|---------------------|----------------|---------------------|------------------------|-------------------------|--------------------|------------------|-----------------|---------------|-------------------|------------------|-----------------|-------------------------|-----------------------|
| Blue                                               | ns, ns              |                |                     |                        |                         |                    |                  |                 |               |                   |                  |                 |                         |                       |
| Turquoise                                          | ns, ns              | ns, ns         |                     |                        |                         |                    |                  |                 |               |                   |                  |                 |                         |                       |
| Green op                                           | ns, ns              | ns, ns         | ns, ns              |                        |                         |                    |                  |                 |               |                   |                  |                 |                         |                       |
| Green tr.                                          | ns, ns              | ns, *          | ns, ns              | ns, ns                 |                         |                    |                  |                 |               |                   |                  |                 |                         |                       |
| Green ash                                          | **, *               | ***, *         | *, *                | **, *                  | ns, *                   |                    |                  |                 |               |                   |                  |                 |                         |                       |
| Yellow                                             | ns, ns              | ns, ns         | ns, ns              | ns, ns                 | ns, ns                  | ***, *             |                  |                 |               |                   |                  |                 |                         |                       |
| Orange                                             | ns, ns              | *, ns          | ns, ns              | ns, ns                 | ns, ns                  | ns, ns             | *, ns            |                 |               |                   |                  |                 |                         |                       |
| Red                                                | ns, ns              | ns, ns         | ns, ns              | ns, ns                 | ns, *                   | *, *               | ns, ns           | ns, ns          |               |                   |                  |                 |                         |                       |
| Red ash                                            | ***, *              | ***, *         | ***, *              | ***, *                 | ns, *                   | ns, *              | ***, *           | ns, ns          | ***, *        |                   |                  |                 |                         |                       |
| Purple                                             | ns, ns              | ns, ns         | ns, ns              | ns, ns                 | ns, ns                  | ns, *              | ns, ns           | ns, ns          | ns, ns        | ns, *             |                  |                 |                         |                       |
| White                                              | ns, *               | ns, ns         | **, *               | ns, ns                 | **, *                   | ***, *             | ns, ns           | ***, ns         | ns, *         | ***, *            | ns, *            |                 |                         |                       |
| White Mg                                           | ns, ns              | ns, ns         | ns, *               | ns, ns                 | ns, *                   | ***, *             | ns, ns           | **, ns          | ns, *         | ***, *            | ns, ns           | ns, ns          |                         |                       |
| Aqua op                                            | ns, ns              | ns, ns         | ns, *               | ns, ns                 | ns, *                   | ***, *             | ns, ns           | **, ns          | ns, ns        | ***, *            | ns, ns           | ns, ns          | ns, ns                  |                       |
| Grey                                               | ns, ns              | ns, ns         | ns, ns              | ns, ns                 | ns, ns                  | ns, *              | ns, ns           | ns, ns          | ns, ns        | ns, *             | ns, ns           | ns, ns          | ns, ns                  | ns, ns                |
| <b><math>\text{Na}_2\text{O}/\text{CaO}</math></b> |                     |                |                     |                        |                         |                    |                  |                 |               |                   |                  |                 |                         |                       |
| Blue                                               | ns, ns              |                |                     |                        |                         |                    |                  |                 |               |                   |                  |                 |                         |                       |
| Turquoise                                          | *, *                | ***, *         |                     |                        |                         |                    |                  |                 |               |                   |                  |                 |                         |                       |
| Green op                                           | ns, ns              | ns, ns         | ns, ns              |                        |                         |                    |                  |                 |               |                   |                  |                 |                         |                       |
| Green tr.                                          | ns, ns              | ns, ns         | ***, *              | ns, *                  |                         |                    |                  |                 |               |                   |                  |                 |                         |                       |
| Green ash                                          | *, *                | ns, ns         | ***, *              | **, *                  | ns, ns                  |                    |                  |                 |               |                   |                  |                 |                         |                       |
| Yellow                                             | ns, ns              | ns, ns         | **, *               | ns, ns                 | ns, ns                  | ns, ns             |                  |                 |               |                   |                  |                 |                         |                       |
| Orange                                             | **, *               | ns, *          | ***, *              | ***, *                 | ns, *                   | ns, *              | ns, *            |                 |               |                   |                  |                 |                         |                       |
| Red                                                | ***, *              | ns, ns         | ***, *              | ***, *                 | ns, ns                  | ns, ns             | ns, ns           | ns, *           |               |                   |                  |                 |                         |                       |
| Red ash                                            | ***, *              | ***, *         | ***, *              | ***, *                 | **, *                   | ns, ns             | ***, *           | ns, ns          | *, *          |                   |                  |                 |                         |                       |
| Purple                                             | ns, ns              | ns, ns         | ns, ns              | ns, ns                 | ns, ns                  | ns, *              | ns, ns           | *, *            | ns, ns        | ***, *            |                  |                 |                         |                       |
| White                                              | ns, ns              | ns, ns         | **, *               | ns, ns                 | ns, ns                  | ns, ns             | ns, ns           | ns, *           | ns, ns        | ***, *            | ns, ns           |                 |                         |                       |
| White Mg                                           | **, *               | ns, *          | ***, *              | ***, *                 | ns, *                   | ns, ns             | ns, ns           | ns, *           | ns, ns        | ns, *             | ns, *            | ns, ns          |                         |                       |
| Aqua op                                            | ns, ns              | ns, ns         | ns, *               | ns, ns                 | ns, ns                  | ns, *              | ns, ns           | **, *           | ns, *         | ***, *            | ns, ns           | ns, ns          | ns, *                   |                       |
| Grey                                               | ns, ns              | ns, ns         | ns, *               | ns, ns                 | ns, ns                  | ns, ns             | ns, ns           | ns, *           | ns, *         | **, *             | ns, ns           | ns, ns          | ns, *                   | ns, ns                |
